# Supplementary material for: Evolutionary and Biotechnological Implications of Robust Hydrogenase Activity in Halophilic Strains of Tetraselmis
Source: PubMed Central journal article supplement (PMC3897525; doi:10.1371/journal.pone.0085812), 2014-01-21
Supplement: pone.0085812.s001.pdf [file pone.0085812.s001.pdf]

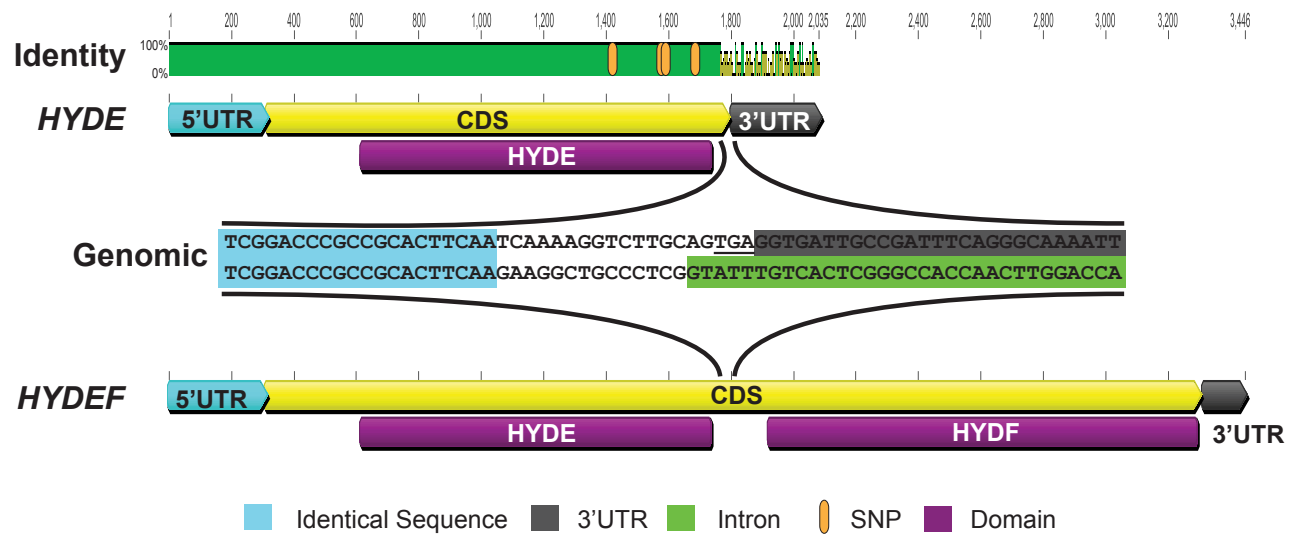

**Figure S1. Schematic representation of the independent *HYDE* and fused *HYDEF* transcripts obtained from transcriptome sequencing.**
