# Supplementary material for: Evolutionary and Biotechnological Implications of Robust Hydrogenase Activity in Halophilic Strains of Tetraselmis
Source: PubMed Central journal article supplement (PMC3897525; doi:10.1371/journal.pone.0085812), 2014-01-21
Supplement: pone.0085812.s002.pdf [file pone.0085812.s002.pdf]

**Table S1. Hydrogenase productivity comparisons between *Tetraselmis* strains and *C. reinhardtii*.**

| Hydrogen assay                                                                               | <i>Tetraselmis</i><br>GSL1 | <i>Tetraselmis</i><br>QNM1 | <i>C. reinhardtii</i><br>4h | <i>C. reinhardtii</i><br>24h |
|----------------------------------------------------------------------------------------------|----------------------------|----------------------------|-----------------------------|------------------------------|
| <b>Photoproduction</b><br>(nmol H <sub>2</sub> •µg chl <sup>-1</sup> •h <sup>-1</sup> )      | 68.34 ± 2.46 <sup>a</sup>  | 78.25 ± 0.89 <sup>a</sup>  | 98 ± 5 <sup>b</sup>         | 20 ± 10 <sup>b</sup>         |
| <b>Dark fermentative production</b><br>(nmol H <sub>2</sub> •µg chl <sup>-1</sup> )          | 44.81 ± 4.06 <sup>a</sup>  | 32.56 ± 4.38 <sup>a</sup>  | 1.29 ± 0.56                 | 1.93 ± 0.92                  |
| <b>Methyl-viologen</b><br>(nmol H <sub>2</sub> •µg chl <sup>-1</sup> •h <sup>-1</sup> )      | <b>4h:</b>                 | <b>4h:</b>                 | <b>4h:</b>                  |                              |
|                                                                                              |                            |                            | 0 % [NaCl]                  |                              |
|                                                                                              |                            |                            | 121 ± 27                    |                              |
|                                                                                              | 1.6 % [NaCl] <sup>c</sup>  | 1.6 % [NaCl] <sup>c</sup>  | 1.6 % [NaCl] <sup>d</sup>   |                              |
|                                                                                              | 700 ± 125                  | 1064 ± 429                 | 129 ± 76                    |                              |
|                                                                                              | 2.5 % [NaCl] <sup>c</sup>  | 2.5 % [NaCl] <sup>c</sup>  | 2.5 % [NaCl] <sup>d</sup>   |                              |
|                                                                                              | 658 ± 148                  | 695 ± 207                  | 141 ± 57                    |                              |
|                                                                                              | 3.18 % [NaCl] <sup>c</sup> | 3.18 % [NaCl] <sup>c</sup> | 3.18 % [NaCl] <sup>d</sup>  |                              |
|                                                                                              | 534 ± 62                   | 608 ± 149                  | 146 ± 44                    |                              |
|                                                                                              | <b>24h:</b>                | <b>24h:</b>                |                             | <b>24h:</b>                  |
|                                                                                              |                            |                            |                             | 0 % [NaCl]                   |
|                                                                                              |                            |                            |                             | 71 ± 13                      |
| 1.6 % [NaCl] <sup>c</sup>                                                                    | 1.6 % [NaCl] <sup>c</sup>  |                            | 1.6 % [NaCl] <sup>d</sup>   |                              |
| 2190 ± 505                                                                                   | 2035 ± 456                 |                            | 65 ± 5                      |                              |
| 2.5 % [NaCl] <sup>c</sup>                                                                    | 2.5 % [NaCl] <sup>c</sup>  |                            | 2.5 % [NaCl] <sup>d</sup>   |                              |
| 1476 ± 161                                                                                   | 1766 ± 326                 |                            | 145 ± 86                    |                              |
| 3.18 % [NaCl] <sup>c</sup>                                                                   | 3.18 % [NaCl] <sup>c</sup> |                            | 3.18 % [NaCl] <sup>d</sup>  |                              |
| 1260 ± 245                                                                                   | 1734 ± 354                 |                            | 117 ± 47                    |                              |
| <b>Methyl-viologen</b><br>(nmol H <sub>2</sub> •µg tot prot <sup>-1</sup> •h <sup>-1</sup> ) | <b>4h:</b>                 | <b>4h:</b>                 | <b>4h:</b>                  |                              |
|                                                                                              |                            |                            | 0 % [NaCl]                  |                              |
|                                                                                              |                            |                            | 2.9 ± 0.7                   |                              |
|                                                                                              | 1.6 % [NaCl] <sup>c</sup>  | 1.6 % [NaCl] <sup>c</sup>  | 1.6 % [NaCl] <sup>d</sup>   |                              |
|                                                                                              | 14 ± 4.6                   | 18.5 ± 4                   | 3.3 ± 1.9                   |                              |
|                                                                                              | 2.5 % [NaCl] <sup>c</sup>  | 2.5 % [NaCl] <sup>c</sup>  | 2.5 % [NaCl] <sup>d</sup>   |                              |
|                                                                                              | 18.2 ± 7.9                 | 14.2 ± 4.8                 | 3.4 ± 1.4                   |                              |
|                                                                                              | 3.18 % [NaCl] <sup>c</sup> | 3.18 % [NaCl] <sup>c</sup> | 3.18 % [NaCl] <sup>d</sup>  |                              |
|                                                                                              | 15.5 ± 4.7                 | 12.5 ± 6.4                 | 4 ± 2.3                     |                              |
|                                                                                              | <b>24h:</b>                | <b>24h:</b>                |                             | <b>24h:</b>                  |
|                                                                                              |                            |                            |                             | 0 % [NaCl]                   |
|                                                                                              |                            |                            |                             | 1.7 ± 0.3                    |
| 1.6 % [NaCl] <sup>c</sup>                                                                    | 1.6 % [NaCl] <sup>c</sup>  |                            | 1.6 % [NaCl] <sup>d</sup>   |                              |
| 56 ± 11.5                                                                                    | 40 ± 16.7                  |                            | 2 ± 1.4                     |                              |
| 2.5 % [NaCl] <sup>c</sup>                                                                    | 2.5 % [NaCl] <sup>c</sup>  |                            | 2.5 % [NaCl] <sup>d</sup>   |                              |
| 44 ± 4                                                                                       | 37.6 ± 6                   |                            | 3.3 ± 2                     |                              |
| 3.18 % [NaCl] <sup>c</sup>                                                                   | 3.18 % [NaCl] <sup>c</sup> |                            | 3.18 % [NaCl] <sup>d</sup>  |                              |
| 37 ± 15                                                                                      | 36 ± 6.8                   |                            | 2.8 ± 1                     |                              |

<sup>a</sup> 7.0% (w/v) NaCl, 24h anoxia induction.

<sup>b</sup> Data from Meuser, et al. (2012) [61].

<sup>d</sup> Anoxia induced in anaerobic induction buffer (AIB) and methyl-viologen (MV) assay performed in MV-f/2 solutions adjusted to the salinities indicated (final concentration). Values represent averages and standard deviations from 6 experimental repetitions.
