# Supplementary material for: Evolutionary and Biotechnological Implications of Robust Hydrogenase Activity in Halophilic Strains of Tetraselmis
Source: PubMed Central journal article supplement (PMC3897525; doi:10.1371/journal.pone.0085812), 2014-01-21
Supplement: pone.0085812.s003.pdf [file pone.0085812.s003.pdf]

**Table S2. Single nucleotide polymorphisms (SNPs) present in *GSL1 HYD* genes.**

| Gene <sup>a</sup> | SNP   | Feature | Type             | Allele 1 <sup>b</sup> |                        | Allele 2 <sup>b</sup> |    |                        |                 |
|-------------------|-------|---------|------------------|-----------------------|------------------------|-----------------------|----|------------------------|-----------------|
|                   |       |         |                  | nt                    | Frequency <sup>c</sup> | AA <sup>d</sup>       | nt | Frequency <sup>c</sup> | AA <sup>d</sup> |
| <i>HYDA</i>       | M212  | 5'UTR   | non-coding       | C                     | 22.9                   | -                     | A  | 75.4                   | -               |
| <i>HYDA</i>       | R222  | CDS     | non-synonymous   | G                     | 31.1                   | A2                    | A  | 68.8                   | T2              |
| <i>HYDA</i>       | Y291  | CDS     | non-synonymous   | C                     | 43.9                   | P25                   | T  | 54.6                   | S25             |
| <i>HYDA</i>       | Y331  | CDS     | non-synonymous   | C                     | 46.3                   | S38                   | T  | 52.7                   | L38             |
| <i>HYDA</i>       | Y343  | CDS     | non-synonymous   | C                     | 43.9                   | A42                   | T  | 53.4                   | V42             |
| <i>HYDA</i>       | W344  | CDS     | non-synonymous   | T                     | 43.3                   | A42                   | A  | 54.5                   | V42             |
| <i>HYDA</i>       | W389  | CDS     | synonymous       | T                     | 39.5                   | nc                    | A  | 55.7                   | nc              |
| <i>HYDA</i>       | W413  | CDS     | synonymous       | A                     | 42.4                   | nc                    | T  | 53.2                   | nc              |
| <i>HYDA</i>       | Y416  | CDS     | synonymous       | T                     | 43.3                   | nc                    | C  | 53.9                   | nc              |
| <i>HYDA</i>       | Y437  | CDS     | synonymous       | T                     | 44.0                   | nc                    | C  | 53.1                   | nc              |
| <i>HYDA</i>       | Y443  | CDS     | synonymous       | C                     | 49.1                   | nc                    | T  | 49.4                   | nc              |
| <i>HYDA</i>       | W464  | CDS     | synonymous       | T                     | 52.6                   | nc                    | A  | 44.6                   | nc              |
| <i>HYDA</i>       | M466  | CDS     | non-synonymous   | C                     | 55.0                   | A83                   | A  | 44.0                   | E83             |
| <i>HYDA</i>       | R467  | CDS     | non-synonymous   | A                     | 55.3                   | A83                   | G  | 43.9                   | E83             |
| <i>HYDA</i>       | Y680  | CDS     | synonymous       | C                     | 57.4                   | nc                    | T  | 41.7                   | nc              |
| <i>HYDA</i>       | Y683  | CDS     | synonymous       | T                     | 57.4                   | nc                    | C  | 42.2                   | nc              |
| <i>HYDA</i>       | S693  | CDS     | non-synonymous   | C                     | 57.5                   | P159                  | G  | 41.8                   | A159            |
| <i>HYDA</i>       | W713  | CDS     | synonymous       | T                     | 58.3                   | nc                    | A  | 40.1                   | nc              |
| <i>HYDA</i>       | R737  | CDS     | synonymous       | G                     | 58.2                   | nc                    | A  | 41.0                   | nc              |
| <i>HYDA</i>       | Y840  | CDS     | synonymous       | C                     | 50.2                   | nc                    | T  | 48.2                   | nc              |
| <i>HYDA</i>       | Y852  | CDS     | synonymous       | T                     | 48.8                   | nc                    | C  | 48.1                   | nc              |
| <i>HYDA</i>       | Y873  | CDS     | synonymous       | C                     | 52.8                   | nc                    | T  | 46.2                   | nc              |
| <i>HYDA</i>       | K882  | CDS     | synonymous       | T                     | 51.6                   | nc                    | G  | 48.1                   | nc              |
| <i>HYDA</i>       | Y909  | CDS     | synonymous       | C                     | 51.5                   | nc                    | T  | 47.0                   | nc              |
| <i>HYDA</i>       | R918  | CDS     | synonymous       | A                     | 49.1                   | nc                    | G  | 50.4                   | nc              |
| <i>HYDA</i>       | N1161 | CDS     | synonymous       | A                     | 53.1                   | nc                    | G  | 45.3                   | nc              |
| <i>HYDA</i>       | Y1183 | CDS     | synonymous       | T                     | 49.3                   | nc                    | C  | 47.3                   | nc              |
| <i>HYDA</i>       | W1321 | CDS     | synonymous       | T                     | 48.5                   | nc                    | A  | 49.2                   | nc              |
| <i>HYDA</i>       | M1345 | CDS     | synonymous       | A                     | 47.7                   | nc                    | C  | 47.6                   | nc              |
| <i>HYDA</i>       | Y1393 | CDS     | synonymous       | T                     | 49.6                   | nc                    | C  | 47.7                   | nc              |
| <i>HYDA</i>       | R1432 | CDS     | synonymous       | G                     | 56.9                   | nc                    | A  | 42.7                   | nc              |
| <i>HYDA</i>       | Y1465 | CDS     | synonymous       | C                     | 58.4                   | nc                    | T  | 40.5                   | nc              |
| <i>HYDA</i>       | Y1480 | CDS     | synonymous       | T                     | 58.1                   | nc                    | C  | 40.6                   | nc              |
| <i>HYDA</i>       | W1483 | CDS     | synonymous       | T                     | 59.1                   | nc                    | A  | 39.7                   | nc              |
| <i>HYDA</i>       | S1495 | CDS     | synonymous       | C                     | 59.2                   | nc                    | G  | 39.4                   | nc              |
| <i>HYDA</i>       | N1613 | 3' UTR  | non-coding indel | -                     | NA                     | -                     | A  | NA                     | -               |
| <i>HYDA</i>       | Y1679 | 3' UTR  | non-coding       | T                     | 51.3                   | -                     | C  | 47.4                   | -               |
| <i>HYDA</i>       | K1703 | 3' UTR  | non-coding       | G                     | 50.0                   | -                     | T  | 49.6                   | -               |
| <i>HYDA</i>       | Y1716 | 3' UTR  | non-coding       | T                     | 51.2                   | -                     | C  | 48.0                   | -               |
| <i>HYDE/EF</i>    | R1419 | CDS     | synonymous       | A                     | 90.0                   | H370                  | G  | 8.5                    | R370            |

|                       |       |        |                |   |      |      |   |      |      |
|-----------------------|-------|--------|----------------|---|------|------|---|------|------|
| <b><i>HYDE/EF</i></b> | R1576 | CDS    | synonymous     | G | 86.7 | nc   | A | 10.2 | nc   |
| <b><i>HYDE/EF</i></b> | Y1591 | CDS    | synonymous     | T | 90.5 | nc   | C | 8.7  | nc   |
| <b><i>HYDE/EF</i></b> | K1685 | CDS    | synonymous     | G | 93.5 | A459 | T | 5.9  | S459 |
| <b><i>HYDE/EF</i></b> | Y     | INTRON | non-coding     | C | 80.6 | -    | T | 13.1 | -    |
| <b><i>HYDE/EF</i></b> | R     | INTRON | non-coding     | A | 85.7 | -    | G | 14.3 | -    |
| <b><i>HYDE/EF</i></b> | Y     | INTRON | non-coding     | C | 93.8 | -    | T | 6.3  | -    |
| <b><i>HYDE/EF</i></b> | Y     | INTRON | non-coding     | T | 88.3 | -    | C | 10.6 | -    |
| <b><i>HYDE/EF</i></b> | Y     | INTRON | non-coding     | T | 87.4 | -    | C | 11.9 | -    |
| <b><i>HYDE/EF</i></b> | R     | INTRON | non-coding     | G | 87.1 | -    | A | 12.1 | -    |
| <b><i>HYDE/EF</i></b> | Y     | INTRON | non-coding     | C | 85.1 | -    | T | 14.5 | -    |
| <b><i>HYDE/EF</i></b> | Y     | INTRON | non-coding     | C | 87.5 | -    | T | 12.6 | -    |
| <b><i>HYDE/EF</i></b> | S     | INTRON | non-coding     | C | NA   | -    | G | NA   | -    |
| <b><i>HYDE/EF</i></b> | S     | INTRON | non-coding     | G | NA   | -    | C | NA   | -    |
| <b><i>HYDE/EF</i></b> | K     | INTRON | non-coding     | G | NA   | -    | T | NA   | -    |
| <b><i>HYDE/EF</i></b> | Y     | INTRON | non-coding     | C | NA   | -    | T | NA   | -    |
| <b><i>HYDG</i></b>    | Y204  | CDS    | non-synonymous | C | 49.7 | R61  | T | 48.6 | W61  |

<sup>a</sup> *HYDE/EF* indicates the comparison of the *HYDE* region of the *HYDE* and *HYDEF*.

<sup>b</sup> For *HYDE/EF* Allele 1 represents *HYDE* and Allele 2 represents *HYDEF*.

<sup>c</sup> Frequency, in percentage, of given allele found in sequenced transcriptome. NA- Frequency not applicable due to low coverage, type of SNP, or location in intron.

<sup>d</sup> AA for allele and location of AA in polypeptide. nc- no AA change.
